# Supplementary material
Source: MDPI journal article supplement (https://www.mdpi.com/2571-6255/4/2/16)
Supplement: s1 [file s1]

# The Effect of Post-fire Rehabilitation and Climate on Fire Regimes in Wyoming Sagebrush Steppe

Chris Bowman-Prideaux<sup>1\*</sup>, Beth A. Newingham<sup>2</sup>, and Eva K. Strand<sup>3</sup>

<sup>1</sup> Department of Forest, Rangeland, and Fire Sciences, University of Idaho, Moscow, Idaho 83844; bowm9710@alumni.uidaho.edu

<sup>2</sup> Agricultural Research Service, Reno Nevada 89512; Beth.Newingham@usda.gov

<sup>3</sup> Department of Forest, Rangeland, and Fire Sciences, University of Idaho, Moscow, Idaho 83844; evas@uidaho.edu

\* Correspondence: bowm9710@alumni.uidaho.edu

Received: date; Accepted: date; Published: date

## Supplementary Materials:

**Table S1.** Geospatial data extracted from shapefiles and raster data sets and used in the predictor matrix for the nonparametric multiplicative regression analyses.

| Predictor Variable                | Note                                                     | Source                                                                                 |
|-----------------------------------|----------------------------------------------------------|----------------------------------------------------------------------------------------|
| <b>Treatment and Fire History</b> |                                                          |                                                                                        |
| Aerial treatments                 | Total number (pre- and post-fire treatments)             | Seeding treatment shapefiles from multiple sources:                                    |
| Drill treatments                  | Total number (pre- and post-fire treatments)             | • Jarbidge and Bruneau Field Office, BLM <sup>4</sup> , Idaho (personal communication) |
| Total treatments                  | Total number (drill and aerial)                          | • Mountain Home Air Force Base, D.O.D. (personal communication)                        |
| First treatment year              | First year a seeding treatment occurred <sup>1</sup>     | • National Operations Center, BLM [1]                                                  |
| First treatment                   | First type of seeding treatment                          | • Land Treatment Digital Library, USGS <sup>4</sup> [2]                                |
| First post-fire treatment year    | First year a seeding treatment after a fire <sup>2</sup> |                                                                                        |
| First post-fire treatment         | First type of seeding treatment                          |                                                                                        |
| Pre-fire treatment                | Type of seeding treatment before the most recent fire    |                                                                                        |
| Post-fire treatment               | Type of seeding treatment after the most recent fire     |                                                                                        |
| First fire year                   | First year a fire burned the site                        | BLM Idaho fire perimeters [3]                                                          |
| <b>Resistance and Resilience</b>  |                                                          |                                                                                        |
| Index rating                      | Resistance and resilience index rating [4]               | Sage Grouse Initiative [5]                                                             |
| <b>Anthropogenic Features</b>     |                                                          |                                                                                        |
| Distance to nearest road          | Within 5 km radius, calculated                           | TIGER 2015 Roads [6]                                                                   |
| Total road length                 | Within 5 km radius, calculated                           |                                                                                        |
| Total area of private land        | Within 5 km radius, calculated                           | BLM Idaho Surface Management Agency [7]                                                |

|                                |                           |                                                                   |
|--------------------------------|---------------------------|-------------------------------------------------------------------|
| Elevation (10 m resolution)    | Digital elevation model   | National Elevation Dataset [8]                                    |
| <b>Climate<sup>3</sup></b>     |                           |                                                                   |
| Maximum temperature            | Monthly, seasonal, annual | Parameter-elevation relationships on independent slopes model [9] |
| Minimum temperature            | Monthly, seasonal, annual |                                                                   |
| Maximum vapor pressure deficit | Monthly, seasonal, annual |                                                                   |
| Minimum vapor pressure deficit | Monthly, seasonal, annual |                                                                   |
| Precipitation                  | Monthly, seasonal, annual |                                                                   |

1. Seeding treatment applied for any reason (e.g.- sagebrush removal, prescribed fire, or wildfire).
2. Prescribed fire or wildfire.
3. These variables include the 30-year average for each month, season, and the annual (16 variables in total).
4. **United State government agency abbreviations: BLM- Bureau of Land Management, U.S.G.S.- U.S. Geological Survey.**

#### Data Citations

1. NOC, *Completed vegetation treatments*. U.S. Department of the Interior (DOI), Bureau of Land Management, Idaho State Office, GIS Staff. <https://catalog.data.gov/dataset/vegetation-treatment-area-completed-polygonbd74a>, Accessed: March 1, 2015. 2014.
2. Pilliod, D.S. and J.L. Welty. *Land Treatment Digital Library: U.S. Geological Survey Data Series 806*. Online at <http://pubs.er.usgs.gov/publication/ds806> (March 2013). 2013; Available from: <https://ltdl.wr.usgs.gov/>.
3. BLM. *Historic fire perimeters*. U.S. Department of the Interior (DOI), Bureau of Land Management, Idaho State Office. 2015; Available from: <https://catalog.data.gov/dataset/fire-perimeters-historic-polygon>, Accessed: March 1, 2015.
4. Maestas, J.D., et al., *Tapping soil survey information for rapid assessment of sagebrush ecosystem resilience and resistance*. *Rangelands*, 2016. **38**(3): p. 120-128.
5. SGI. *Ecosystem resilience and resistance*. 2016; Available from: <https://map.sagegrouseinitiative.com/ecosystem>.
6. Division, G., *TIGER 2015 Roads*, U.S.C.B. U.S. Department of Commerce, Editor. 2015: USDA Geospatial Data Gateway.
7. BLM, *BLM Idaho Surface Management Agency (Surface Ownership)*, B.o.L.M.B. U.S. Department of Interior, Idaho State Office, Editor. 2015.
8. USGS. *National Elevation Dataset*. 2012 [cited 2013 March 1]; Available from: <https://datagateway.nrcs.usda.gov/GDGOrder.aspx>.
9. Daly, C. *United States average monthly and annual precipitation, 1981-2010 (4km; BIL)*. 2013; Available from: <http://www.prism.oregonstate.edu/>.

**Table S2.** Treatment histories for sites by the total number of aerial or drill seeding. Sites labeled “never seeded” have no recorded seeding treatment since 1950.

| Treatment Type | Treatment (n) | Sample size |
|----------------|---------------|-------------|
| Aerial         | 0             | 313         |
|                | 1             | 177         |
|                | 2             | 65          |
|                | 3             | 16          |
|                | 4             | 1           |
|                | 5             | 1           |
| Drill          | 0             | 264         |
|                | 1             | 244         |
|                | 2             | 57          |
|                | 3             | 8           |
| Never seeded   | -             | 199         |

**Table S3.** The number of sites treated by aerial or drill seeding on site with a history of 0-7 fires,.

|          |   | Seeding (n) |    |    |    |
|----------|---|-------------|----|----|----|
| Fire (n) |   | 0           | 1  | 2  | ≥3 |
| Aerial   | 0 | 160         | 3  | 0  | 0  |
|          | 1 | 55          | 60 | 0  | 0  |
|          | 2 | 65          | 65 | 24 | 0  |
|          | 3 | 17          | 25 | 16 | 5  |
|          | 4 | 7           | 15 | 12 | 8  |
|          | 5 | 6           | 6  | 10 | 2  |
|          | 6 | 3           | 3  | 2  | 2  |
|          | 7 | 0           | 0  | 1  | 1  |
| Drill    | 0 | 126         | 30 | 5  | 2  |
|          | 1 | 52          | 59 | 4  | 0  |
|          | 2 | 57          | 75 | 19 | 3  |
|          | 3 | 13          | 35 | 14 | 1  |
|          | 4 | 9           | 22 | 10 | 1  |
|          | 5 | 5           | 16 | 2  | 1  |
|          | 6 | 2           | 6  | 2  | 0  |
|          | 7 | 0           | 1  | 1  | 0  |

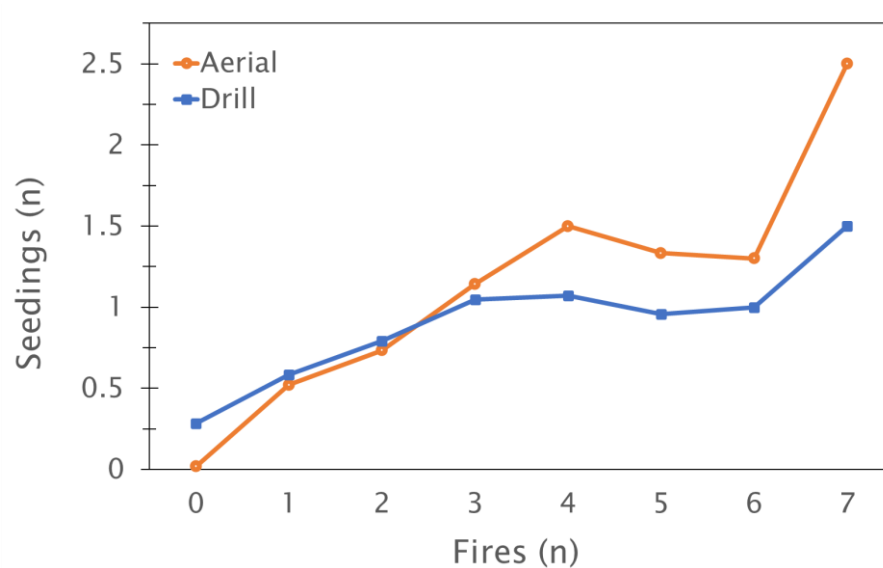

**Figure S1.** The weighted average number of aerial and drill seedings for sites that had 0-7 fires.

**Table S4.** The relative contribution of biomass from each functional type to the NMS ordination. The ordination explained 90% of the variation in data (axis 1-  $R^2=0.628$ ; axis 2-  $R^2=0.272$ ).

|                      | Axis 1 |       |        | Axis 2 |       |        |
|----------------------|--------|-------|--------|--------|-------|--------|
|                      | r      | r-sq  | tau    | r      | r-sq  | tau    |
| Perennial Bunchgrass | -0.468 | 0.219 | -0.331 | 0.636  | 0.404 | 0.427  |
| Annual grass         | 0.073  | 0.005 | 0.097  | -0.925 | 0.855 | -0.789 |
| Forb                 | -0.217 | 0.047 | -0.06  | -0.341 | 0.117 | -0.256 |
| Shrub                | 0.941  | 0.886 | 0.841  | 0.049  | 0.002 | 0.095  |

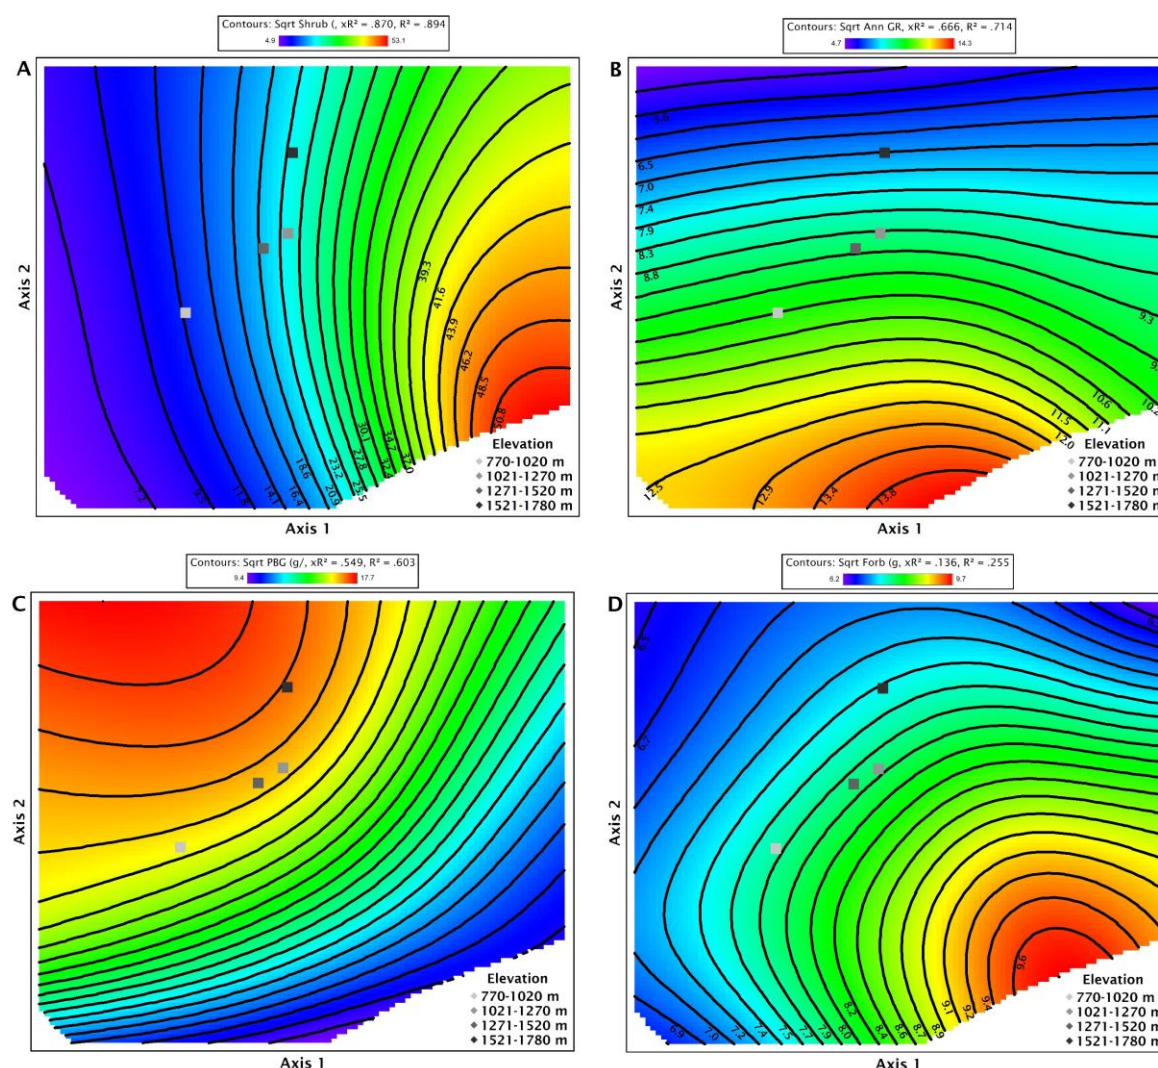

**Figure S2.** Contour maps showing where shrub (A), annual grass (B), perennial bunchgrass (C), and

**Table S5.** Multiple comparisons between different seeding treatments nested within elevation ranges. Seeding treatments were on unburned ( $n=11$ ) and burned sites ( $n=56$ ). Significant differences based on the False Detection Rate adjusted alpha ( $\alpha=0.0115$ ) noted with (\*) while all comparisons with a  $p < 0.05$  are indicated in bold. The  $T$ -statistic indicates how different each group is while  $A$  is the chance corrected within-group similarity. The table is sorted by lowest to highest  $p$ -value.

| Elevation-Seeding | vs. | Elevation-Seeding | $T$   | $A$  | $p$    |
|-------------------|-----|-------------------|-------|------|--------|
| High-Aerial*      | vs. | Low-Unseeded      | -6.48 | 0.25 | 0.0002 |
| High-Aerial*      | vs. | Med High-Aerial   | -3.92 | 0.19 | 0.0025 |
| High-Aerial*      | vs. | Low-Aerial        | -3.51 | 0.21 | 0.0039 |
| High-Aerial*      | vs. | Med Low-Aerial    | -3.02 | 0.10 | 0.0097 |
| High-Aerial       | vs. | Med Low-Unseeded  | -3.01 | 0.12 | 0.0161 |
| High-Aerial       | vs. | Med High-Unseeded | -2.39 | 0.10 | 0.027  |
| High-Unseeded     | vs. | Med High-Aerial   | -2.10 | 0.24 | 0.035  |
| Med Low-Aerial    | vs. | Med Low-Unseeded  | -2.20 | 0.10 | 0.038  |
| Med High-Aerial   | vs. | Med Low-Drill     | -1.94 | 0.16 | 0.044  |
| High-Aerial       | vs. | High-Unseeded     | -1.85 | 0.10 | 0.051  |
| Low-Unseeded      | vs. | Med Low-Drill     | -1.80 | 0.08 | 0.06   |

|                   |     |                   |       |       |      |
|-------------------|-----|-------------------|-------|-------|------|
| Med Low-Drill     | vs. | Med Low-Aerial    | -1.71 | 0.08  | 0.07 |
| Med Low-Drill     | vs. | Low-Aerial        | -1.62 | 0.17  | 0.07 |
| Low-Unseeded      | vs. | Med Low-Aerial    | -1.54 | 0.06  | 0.08 |
| High-Aerial       | vs. | Med High-Drill    | -1.51 | 0.05  | 0.08 |
| Low-Unseeded      | vs. | High-Unseeded     | -1.43 | 0.08  | 0.09 |
| Low-Unseeded      | vs. | Med Low-Unseeded  | -1.31 | 0.06  | 0.10 |
| Med High-Aerial   | vs. | Med Low-Aerial    | -1.29 | 0.11  | 0.11 |
| Med Low-Unseeded  | vs. | Low-Aerial        | -1.12 | 0.10  | 0.13 |
| Med High-Aerial   | vs. | Med High-Unseeded | -1.05 | 0.08  | 0.14 |
| Med Low-Aerial    | vs. | Low-Aerial        | -1.08 | 0.10  | 0.14 |
| Med High-Aerial   | vs. | Med Low-Unseeded  | -0.97 | 0.07  | 0.15 |
| Med High-Unseeded | vs. | Low-Unseeded      | -0.85 | 0.04  | 0.17 |
| High-Unseeded     | vs. | Med Low-Unseeded  | -0.87 | 0.07  | 0.17 |
| Med High-Drill    | vs. | Low-Unseeded      | -0.77 | 0.03  | 0.19 |
| Med High-Aerial   | vs. | Med High-Drill    | -0.81 | 0.04  | 0.19 |
| Med High-Drill    | vs. | Low-Aerial        | -0.83 | 0.05  | 0.19 |
| Med High-Drill    | vs. | Med Low-Unseeded  | -0.55 | 0.02  | 0.22 |
| Med High-Unseeded | vs. | Low-Aerial        | -0.53 | 0.05  | 0.25 |
| Med High-Unseeded | vs. | Med Low-Aerial    | -0.47 | 0.02  | 0.26 |
| Med Low-Drill     | vs. | Med Low-Unseeded  | -0.27 | 0.01  | 0.28 |
| Med Low-Drill     | vs. | High-Unseeded     | -0.36 | 0.03  | 0.28 |
| High-Aerial       | vs. | Med Low-Drill     | -0.40 | 0.02  | 0.29 |
| Med High-Unseeded | vs. | Med Low-Unseeded  | -0.03 | 0.00  | 0.35 |
| Med High-Drill    | vs. | High-Unseeded     | -0.19 | 0.01  | 0.36 |
| Med High-Drill    | vs. | Med Low-Aerial    | -0.13 | 0.00  | 0.37 |
| Med High-Unseeded | vs. | High-Unseeded     | -0.03 | 0.00  | 0.39 |
| High-Unseeded     | vs. | Med Low-Aerial    | -0.11 | 0.01  | 0.40 |
| Med High-Drill    | vs. | Med High-Unseeded | 0.24  | -0.01 | 0.49 |
| Med High-Unseeded | vs. | Med Low-Drill     | 0.33  | -0.02 | 0.51 |
| Med High-Aerial   | vs. | Low-Unseeded      | 0.60  | -0.04 | 0.68 |
| Med High-Drill    | vs. | Med Low-Drill     | 0.76  | -0.03 | 0.77 |
| Low-Unseeded      | vs. | Low-Aerial        | 0.81  | -0.05 | 0.78 |
| Med High-Aerial   | vs. | Low-Aerial        | 0.50  | -0.09 | 1.0  |
